# Supplementary material
Source: publisher figshare collection journal article supplement (https://gsapubs.figshare.com/articles/dataset/_/12535001)
Supplement: Supplementary file 1 [file 1]

## Sheet: tremor_density_and_faults
X	Y	all_tremor_density	all_inside_steepest_gradient	inside_steepest_gradient_and_near_any_fault	inside_steepest_gradient_and_far_from_all_faults
-68000	4130000	0.00305158
-66000	4130000	0.0122484
-64000	4130000	0.0182356
-62000	4130000	0.0210382
-60000	4130000	0.0208281
-58000	4130000	0.0183345
-56000	4130000	0.0148639
-54000	4130000	0.0119485
-52000	4130000	0.0104217
-50000	4130000	0.00972773
-48000	4130000	0.00814862
-46000	4130000	0.00518958
-44000	4130000	0.00172099
-42000	4130000	-0.00197679
-40000	4130000	-0.00598447
-38000	4130000	-0.0102868
-70000	4132000	-0.012237
-68000	4132000	0.00092723
-66000	4132000	0.0109076
-64000	4132000	0.0176756
-62000	4132000	0.0214534
-60000	4132000	0.022409
-58000	4132000	0.0215155
-56000	4132000	0.0201362
-54000	4132000	0.0185321
-52000	4132000	0.0168113
-50000	4132000	0.0158018
-48000	4132000	0.0138004
-46000	4132000	0.0107029
-44000	4132000	0.00707973
-42000	4132000	0.00317482
-40000	4132000	-0.000970203
-34000	4132000	-0.0136295
-72000	4134000	-0.0285775
-70000	4134000	-0.0121763
-68000	4134000	0.00147588
-66000	4134000	0.011981
-64000	4134000	0.0193925
-62000	4134000	0.0238383
-60000	4134000	0.0255714
-58000	4134000	0.0256885
-56000	4134000	0.025701
-54000	4134000	0.0248858
-52000	4134000	0.0227865
-50000	4134000	0.0221091
-48000	4134000	0.0199955
-46000	4134000	0.0166581
-44000	4134000	0.0127563
-42000	4134000	0.00859495
-36000	4134000	-0.00454088
-34000	4134000	-0.00860723
-32000	4134000	-0.0121488
-70000	4136000	-0.0105738
-68000	4136000	0.003477
-66000	4136000	0.0144998
-64000	4136000	0.0224175
-62000	4136000	0.0274802
-60000	4136000	0.0294551
-58000	4136000	0.0306434
-56000	4136000	0.0320665
-54000	4136000	0.0326129
-52000	4136000	0.031368
-50000	4136000	0.029672
-48000	4136000	0.0267664
-46000	4136000	0.0229645
-44000	4136000	0.0187515
-42000	4136000	0.0143018
-38000	4136000	0.00497653
-36000	4136000	0.00033333
-34000	4136000	-0.00385739
-32000	4136000	-0.00729369
-30000	4136000	-0.0102134
-68000	4138000	0.00594059
-66000	4138000	0.0174871
-64000	4138000	0.0260518
-62000	4138000	0.0311791
-60000	4138000	0.0337557
-58000	4138000	0.0365649
-56000	4138000	0.0395673
-54000	4138000	0.0412776
-52000	4138000	0.0403115
-50000	4138000	0.0376774
-48000	4138000	0.0339267
-46000	4138000	0.0296627
-44000	4138000	0.0251832
-42000	4138000	0.0205423
-40000	4138000	0.0155671
-38000	4138000	0.010345
-36000	4138000	0.00513637
-34000	4138000	0.000578893
-32000	4138000	-0.00276305
-30000	4138000	-0.00544537
-28000	4138000	-0.00795694
-70000	4140000	-0.00694513
-68000	4140000	0.00802311
-66000	4140000	0.0202049
-64000	4140000	0.0290836
-62000	4140000	0.0351404
-60000	4140000	0.0390601
-58000	4140000	0.04398
-56000	4140000	0.0481912
-54000	4140000	0.0510654
-52000	4140000	0.0494808
-50000	4140000	0.0455559
-48000	4140000	0.0411255
-46000	4140000	0.0367406
-44000	4140000	0.0322811
-42000	4140000	0.0275234
-40000	4140000	0.0220653
-38000	4140000	0.016106
-36000	4140000	0.010067
-34000	4140000	0.00488762
-32000	4140000	0.00169575
-30000	4140000	-0.000703267
-28000	4140000	-0.00304249
-26000	4140000	-0.00551449
-70000	4142000	-0.00609839
-68000	4142000	0.00935574
-66000	4142000	0.0218267
-64000	4142000	0.0316918
-62000	4142000	0.0400921
-60000	4142000	0.0475018
-58000	4142000	0.0519685
-56000	4142000	0.0565356
-54000	4142000	0.0604705
-52000	4142000	0.0573737
-50000	4142000	0.0527243
-48000	4142000	0.0484138
-46000	4142000	0.044073
-44000	4142000	0.0399482
-42000	4142000	0.0351474
-40000	4142000	0.0292637
-38000	4142000	0.0226025
-36000	4142000	0.0158045
-34000	4142000	0.00976092
-32000	4142000	0.00685577
-30000	4142000	0.00457203
-28000	4142000	0.00219302
-26000	4142000	-0.000431783
-24000	4142000	-0.00325099
-72000	4144000	-0.0242164
-70000	4144000	-0.00598334
-68000	4144000	0.00984119
-66000	4144000	0.022595
-64000	4144000	0.0331561
-62000	4144000	0.0424036
-60000	4144000	0.0504044
-58000	4144000	0.0559464
-56000	4144000	0.060501
-54000	4144000	0.0630582
-52000	4144000	0.0627872
-50000	4144000	0.0598566
-48000	4144000	0.0555106
-46000	4144000	0.0513533
-44000	4144000	0.0476136
-42000	4144000	0.0429909
-40000	4144000	0.0370169
-38000	4144000	0.0301138
-36000	4144000	0.0233631
-34000	4144000	0.017576
-32000	4144000	0.01383
-30000	4144000	0.0108839
-28000	4144000	0.00798218
-26000	4144000	0.00488353
-72000	4146000	-0.0251039
-70000	4146000	-0.00597174
-68000	4146000	0.0102698
-66000	4146000	0.0232126
-64000	4146000	0.0338673
-62000	4146000	0.0431562
-60000	4146000	0.0511682
-58000	4146000	0.0579596
-56000	4146000	0.0632854
-54000	4146000	0.0683042
-52000	4146000	0.0703251
-50000	4146000	0.0678006
-48000	4146000	0.0632015
-46000	4146000	0.058893
-44000	4146000	0.0550926
-42000	4146000	0.0510775
-40000	4146000	0.0451921
-38000	4146000	0.0385558
-36000	4146000	0.0320115
-34000	4146000	0.0262062
-32000	4146000	0.0216371
-30000	4146000	0.0177913
-28000	4146000	0.0140894
-74000	4148000	-0.0471841
-72000	4148000	-0.0252846
-70000	4148000	-0.00500609
-68000	4148000	0.0117557
-66000	4148000	0.0246334
-64000	4148000	0.0349703
-62000	4148000	0.0439525
-60000	4148000	0.0518041
-58000	4148000	0.0597679
-56000	4148000	0.0651889
-54000	4148000	0.0732584
-52000	4148000	0.0773002
-50000	4148000	0.0748923
-48000	4148000	0.0709931
-46000	4148000	0.0666241
-44000	4148000	0.0630873
-42000	4148000	0.0601221
-40000	4148000	0.0550167
-38000	4148000	0.0484729
-36000	4148000	0.0414548
-34000	4148000	0.0350835
-32000	4148000	0.0295222
-30000	4148000	0.0246866
-28000	4148000	0.0201292
-26000	4148000	0.0156031
-76000	4150000	-0.0717077
-74000	4150000	-0.0476105
-72000	4150000	-0.0239174
-70000	4150000	-0.00235491
-68000	4150000	0.0152033
-66000	4150000	0.0273083
-64000	4150000	0.0369903
-62000	4150000	0.045902
-60000	4150000	0.054669
-58000	4150000	0.0638065
-56000	4150000	0.0691557
-54000	4150000	0.074747
-52000	4150000	0.0757391
-50000	4150000	0.0731861
-48000	4150000	0.0771372
-46000	4150000	0.0766186
-44000	4150000	0.0725186
-42000	4150000	0.0712312
-40000	4150000	0.0658993
-38000	4150000	0.0581526
-36000	4150000	0.0499404
-34000	4150000	0.0429077
-32000	4150000	0.0364635
-30000	4150000	0.030913
-28000	4150000	0.0256898
-26000	4150000	0.0205509
-24000	4150000	0.0154569
-78000	4152000	-0.0986452
-76000	4152000	-0.0730968
-74000	4152000	-0.0471509
-72000	4152000	-0.0219466
-70000	4152000	0.000857199
-68000	4152000	0.0194921
-66000	4152000	0.0299149
-64000	4152000	0.0384268
-62000	4152000	0.0467937
-60000	4152000	0.0552729
-58000	4152000	0.0638297
-56000	4152000	0.071024
-54000	4152000	0.0775458
-52000	4152000	0.0783834
-50000	4152000	0.0811528
-48000	4152000	0.0878797
-46000	4152000	0.0893115
-44000	4152000	0.0859031
-42000	4152000	0.0817402
-40000	4152000	0.0746722
-38000	4152000	0.0651444
-36000	4152000	0.0556308
-34000	4152000	0.0477842
-32000	4152000	0.0415962
-30000	4152000	0.0360787
-28000	4152000	0.0306134
-26000	4152000	0.0250379
-76000	4154000	-0.0745742
-74000	4154000	-0.0474201
-72000	4154000	-0.0213734
-70000	4154000	0.00153
-68000	4154000	0.0186958
-66000	4154000	0.0294242
-64000	4154000	0.0377795
-62000	4154000	0.0458135
-60000	4154000	0.0539419
-58000	4154000	0.0623754
-56000	4154000	0.0710993
-54000	4154000	0.0802415
-52000	4154000	0.0839359
-50000	4154000	0.0859009
-48000	4154000	0.0903051
-46000	4154000	0.095034
-44000	4154000	0.0948794
-42000	4154000	0.0896107
-40000	4154000	0.0806076
-38000	4154000	0.0697207
-36000	4154000	0.0595055
-34000	4154000	0.0512146
-32000	4154000	0.0457642
-30000	4154000	0.040626
-28000	4154000	0.0350581
-26000	4154000	0.0291272
-24000	4154000	0.0230523
-78000	4156000	-0.104666
-76000	4156000	-0.0770881
-74000	4156000	-0.0491227
-72000	4156000	-0.0221082
-70000	4156000	0.00135879
-68000	4156000	0.0172479
-66000	4156000	0.0273947
-64000	4156000	0.0354382
-62000	4156000	0.0432296
-60000	4156000	0.0510397
-58000	4156000	0.0588886
-56000	4156000	0.067831
-54000	4156000	0.0781461
-52000	4156000	0.0843488
-50000	4156000	0.0874379
-48000	4156000	0.0934845
-46000	4156000	0.100054
-44000	4156000	0.102257
-42000	4156000	0.0952864
-40000	4156000	0.0847606
-38000	4156000	0.0726423
-36000	4156000	0.0616756
-34000	4156000	0.0542382
-32000	4156000	0.0494276
-30000	4156000	0.0447262
-28000	4156000	0.039106
-26000	4156000	0.0327666
-80000	4158000	-0.134828
-78000	4158000	-0.108712
-76000	4158000	-0.0807922
-74000	4158000	-0.052205
-72000	4158000	-0.0240675
-70000	4158000	0.000659384
-68000	4158000	0.015297
-66000	4158000	0.0245288
-64000	4158000	0.0320927
-62000	4158000	0.0397365
-60000	4158000	0.0472414
-58000	4158000	0.0549494
-56000	4158000	0.0649391
-54000	4158000	0.0755622
-52000	4158000	0.0854457
-50000	4158000	0.0906257
-48000	4158000	0.0973071
-46000	4158000	0.103319
-44000	4158000	0.105088
-42000	4158000	0.098197
-40000	4158000	0.0880477
-38000	4158000	0.0743639
-36000	4158000	0.0620992
-34000	4158000	0.0555376
-32000	4158000	0.0522364
-30000	4158000	0.048268
-28000	4158000	0.0425782
-26000	4158000	0.0358184
-78000	4160000	-0.11319
-76000	4160000	-0.0852717
-74000	4160000	-0.0565892
-72000	4160000	-0.0287544
-70000	4160000	-0.00458886
-68000	4160000	0.011886
-66000	4160000	0.0211551
-64000	4160000	0.0286263
-62000	4160000	0.0361292
-60000	4160000	0.0436416
-58000	4160000	0.0517839
-56000	4160000	0.0611924
-54000	4160000	0.0734403
-52000	4160000	0.0865123
-50000	4160000	0.0924838
-48000	4160000	0.0986454
-46000	4160000	0.105159
-44000	4160000	0.107479
-42000	4160000	0.101614
-40000	4160000	0.0925925
-38000	4160000	0.0794316
-36000	4160000	0.0688019
-34000	4160000	0.0599759
-32000	4160000	0.0566574
-30000	4160000	0.0519442
-28000	4160000	0.0455209
-26000	4160000	0.0380967
-24000	4160000	0.0305072
-78000	4162000	-0.117156
-76000	4162000	-0.0892614
-74000	4162000	-0.0609107
-72000	4162000	-0.0336786
-70000	4162000	-0.00949308
-68000	4162000	0.00926184
-66000	4162000	0.0183779
-64000	4162000	0.0258833
-62000	4162000	0.0334962
-60000	4162000	0.0411021
-58000	4162000	0.0492589
-56000	4162000	0.0583263
-54000	4162000	0.0696557
-52000	4162000	0.0801149
-50000	4162000	0.0885625
-48000	4162000	0.0977932
-46000	4162000	0.107539
-44000	4162000	0.114067
-42000	4162000	0.11458
-40000	4162000	0.104292
-38000	4162000	0.0921823
-36000	4162000	0.0816512
-34000	4162000	0.0726554
-32000	4162000	0.0642747
-30000	4162000	0.0566679
-28000	4162000	0.048396
-26000	4162000	0.0398481
-24000	4162000	0.031479
-76000	4164000	-0.0913133
-74000	4164000	-0.0631524
-72000	4164000	-0.0369478
-70000	4164000	-0.0141356
-68000	4164000	0.00369141
-66000	4164000	0.0153068
-64000	4164000	0.0243435
-62000	4164000	0.03273
-60000	4164000	0.0410737
-58000	4164000	0.0494038
-56000	4164000	0.0586108
-54000	4164000	0.0698906
-52000	4164000	0.0814073
-50000	4164000	0.0874957
-48000	4164000	0.0983778
-46000	4164000	0.109812
-44000	4164000	0.118717
-42000	4164000	0.119886
-40000	4164000	0.112728
-38000	4164000	0.102547
-36000	4164000	0.092344
-34000	4164000	0.0810844
-32000	4164000	0.0716279
-30000	4164000	0.0618754
-28000	4164000	0.0515893
-26000	4164000	0.0413718
-24000	4164000	0.0319712
-22000	4164000	0.0232185
-76000	4166000	-0.0889931
-74000	4166000	-0.0604516
-72000	4166000	-0.0352047
-70000	4166000	-0.0139132
-68000	4166000	0.00307523
-66000	4166000	0.0157934
-64000	4166000	0.0260259
-62000	4166000	0.0356738
-60000	4166000	0.0447478
-58000	4166000	0.0527527
-56000	4166000	0.060382
-54000	4166000	0.0713203
-52000	4166000	0.0812438
-50000	4166000	0.0891171
-48000	4166000	0.101078
-46000	4166000	0.113838
-44000	4166000	0.12488
-42000	4166000	0.125076
-40000	4166000	0.118876
-38000	4166000	0.109513
-36000	4166000	0.0994755
-34000	4166000	0.0882033
-32000	4166000	0.0788116
-30000	4166000	0.0671514
-28000	4166000	0.0546602
-26000	4166000	0.0426073
-24000	4166000	0.0320103
-22000	4166000	0.022683
-20000	4166000	0.0143457
-8000	4166000	-0.0241821
-74000	4168000	-0.0505897
-72000	4168000	-0.0262169
-70000	4168000	-0.00572277
-68000	4168000	0.00999398
-66000	4168000	0.0230823
-64000	4168000	0.0346872
-62000	4168000	0.0459333
-60000	4168000	0.054903
-58000	4168000	0.0606199
-56000	4168000	0.0662928
-54000	4168000	0.075263
-52000	4168000	0.0834091
-50000	4168000	0.0918267
-48000	4168000	0.104804
-46000	4168000	0.116684
-44000	4168000	0.125507
-42000	4168000	0.126476
-40000	4168000	0.122492
-38000	4168000	0.114147
-36000	4168000	0.106804
-34000	4168000	0.0980026
-32000	4168000	0.0866462
-30000	4168000	0.0716873
-28000	4168000	0.0566617
-26000	4168000	0.0429513
-24000	4168000	0.0319358
-22000	4168000	0.0224356
-20000	4168000	0.0149066
-18000	4168000	0.0090065
-10000	4168000	-0.0193591
-8000	4168000	-0.0240748
-6000	4168000	-0.0270554
-76000	4170000	-0.0621453
-74000	4170000	-0.0322254
-72000	4170000	-0.0071168
-70000	4170000	0.0129355
-68000	4170000	0.0272798
-66000	4170000	0.0423072
-64000	4170000	0.0563348
-62000	4170000	0.0678849
-60000	4170000	0.0749876
-58000	4170000	0.076996
-56000	4170000	0.0796213
-54000	4170000	0.0846805
-52000	4170000	0.0912739
-50000	4170000	0.10023
-48000	4170000	0.113317
-46000	4170000	0.1207
-44000	4170000	0.125256
-42000	4170000	0.125409
-40000	4170000	0.120811
-38000	4170000	0.114753
-36000	4170000	0.110899
-34000	4170000	0.105937
-32000	4170000	0.0923869
-30000	4170000	0.0745979
-28000	4170000	0.057496
-26000	4170000	0.0431558
-24000	4170000	0.0323896
-22000	4170000	0.0240454
-20000	4170000	0.0187224
-18000	4170000	0.0146733
-16000	4170000	0.0090497
-12000	4170000	-0.00858131
-10000	4170000	-0.0166044
-8000	4170000	-0.0208813
-6000	4170000	-0.0237515
-4000	4170000	-0.0265823
-110000	4172000	-0.136608
-86000	4172000	-0.180042
-78000	4172000	-0.0721602
-76000	4172000	-0.0354767
-74000	4172000	-0.00320665
-72000	4172000	0.0231414
-70000	4172000	0.0391135
-68000	4172000	0.0578118
-66000	4172000	0.0770071
-64000	4172000	0.0899622
-62000	4172000	0.100982
-60000	4172000	0.105507
-58000	4172000	0.102444
-56000	4172000	0.0966561
-54000	4172000	0.0999514
-52000	4172000	0.11185
-50000	4172000	0.124193
-48000	4172000	0.1302
-46000	4172000	0.1319
-44000	4172000	0.129305
-42000	4172000	0.122506
-40000	4172000	0.118723
-38000	4172000	0.113265
-36000	4172000	0.112535
-34000	4172000	0.111104
-32000	4172000	0.0954417
-30000	4172000	0.0759369
-28000	4172000	0.0587704
-26000	4172000	0.046208
-24000	4172000	0.0353639
-22000	4172000	0.0299578
-20000	4172000	0.0278221
-18000	4172000	0.0255613
-16000	4172000	0.0201874
-14000	4172000	0.0110888
-12000	4172000	-0.00034288
-10000	4172000	-0.00914201
-8000	4172000	-0.0131165
-6000	4172000	-0.0171485
-4000	4172000	-0.0214588
-2000	4172000	-0.0254054
-114000	4174000	-0.107625
-112000	4174000	-0.105937
-110000	4174000	-0.107402
-108000	4174000	-0.11269
-104000	4174000	-0.131318
-92000	4174000	-0.173678
-88000	4174000	-0.166668
-86000	4174000	-0.158018
-84000	4174000	-0.142689
-80000	4174000	-0.0800615
-78000	4174000	-0.0391644
-76000	4174000	0.00166642
-74000	4174000	0.0374644
-72000	4174000	0.0607054
-70000	4174000	0.0823982
-68000	4174000	0.108968
-66000	4174000	0.12347
-64000	4174000	0.137355
-62000	4174000	0.147179
-60000	4174000	0.147232
-58000	4174000	0.133935
-56000	4174000	0.120183
-54000	4174000	0.121818
-52000	4174000	0.135997
-50000	4174000	0.145418
-48000	4174000	0.147684
-46000	4174000	0.148569
-44000	4174000	0.144557
-42000	4174000	0.135838
-40000	4174000	0.126754
-38000	4174000	0.117736
-36000	4174000	0.111915
-34000	4174000	0.107724
-32000	4174000	0.0943548
-30000	4174000	0.0756688
-28000	4174000	0.0611005
-26000	4174000	0.050735
-24000	4174000	0.0414964
-22000	4174000	0.0411749
-20000	4174000	0.0436398
-18000	4174000	0.0440143
-16000	4174000	0.0391826
-14000	4174000	0.028389
-12000	4174000	0.0138143
-10000	4174000	0.00334126
-8000	4174000	-0.00138789
-6000	4174000	-0.00855221
-4000	4174000	-0.0154535
-2000	4174000	-0.0210152
0	4174000	-0.0251471
-116000	4176000	-0.0839852
-114000	4176000	-0.0785803
-112000	4176000	-0.0752118
-110000	4176000	-0.0757882
-108000	4176000	-0.0813809
-106000	4176000	-0.09055
-104000	4176000	-0.101795
-102000	4176000	-0.114722
-96000	4176000	-0.142763
-94000	4176000	-0.144262
-92000	4176000	-0.143095
-90000	4176000	-0.140737
-88000	4176000	-0.133952
-86000	4176000	-0.121934
-84000	4176000	-0.104574
-82000	4176000	-0.0765262
-80000	4176000	-0.039046
-78000	4176000	0.00613318
-76000	4176000	0.0528921
-74000	4176000	0.0936536
-72000	4176000	0.12578
-70000	4176000	0.155193
-68000	4176000	0.184606
-66000	4176000	0.19694
-64000	4176000	0.208986
-62000	4176000	0.215132
-60000	4176000	0.206684
-58000	4176000	0.184335
-56000	4176000	0.163503
-54000	4176000	0.158275
-52000	4176000	0.166939
-50000	4176000	0.171227
-48000	4176000	0.170769
-46000	4176000	0.166566
-44000	4176000	0.158576
-42000	4176000	0.147916
-40000	4176000	0.1401
-38000	4176000	0.126469
-36000	4176000	0.114733
-34000	4176000	0.104633
-32000	4176000	0.0925154
-30000	4176000	0.0770774
-28000	4176000	0.0631394
-26000	4176000	0.0555017
-24000	4176000	0.0519733
-22000	4176000	0.0602456
-20000	4176000	0.0691332
-18000	4176000	0.0731102
-16000	4176000	0.0680268
-14000	4176000	0.0528412
-12000	4176000	0.0325308
-10000	4176000	0.0163157
-8000	4176000	0.0101268
-6000	4176000	-0.00156911
-4000	4176000	-0.0106015
-2000	4176000	-0.0171151
0	4176000	-0.0217804
2000	4176000	-0.0250038
-118000	4178000	-0.0658183
-116000	4178000	-0.0571861
-114000	4178000	-0.049019
-112000	4178000	-0.0432931
-110000	4178000	-0.0424448
-108000	4178000	-0.0484981
-106000	4178000	-0.0573859
-104000	4178000	-0.068339
-102000	4178000	-0.0822506
-100000	4178000	-0.0948173
-98000	4178000	-0.103777
-96000	4178000	-0.107861
-94000	4178000	-0.1071
-92000	4178000	-0.104379
-90000	4178000	-0.0995121
-88000	4178000	-0.0870523
-86000	4178000	-0.0687667
-84000	4178000	-0.047942
-82000	4178000	-0.0202522
-80000	4178000	0.0184491
-78000	4178000	0.0679563
-76000	4178000	0.122867
-74000	4178000	0.177877
-72000	4178000	0.215688
-70000	4178000	0.247518
-68000	4178000	0.286011
-66000	4178000	0.308812
-64000	4178000	0.307122
-62000	4178000	0.302016
-60000	4178000	0.282658
-58000	4178000	0.257217
-56000	4178000	0.233031
-54000	4178000	0.218662
-52000	4178000	0.208264
-50000	4178000	0.201228
-48000	4178000	0.194253
-46000	4178000	0.18624
-44000	4178000	0.178534
-42000	4178000	0.175229
-40000	4178000	0.152307
-38000	4178000	0.133982
-36000	4178000	0.118669
-34000	4178000	0.108407
-32000	4178000	0.0984894
-30000	4178000	0.0840046
-28000	4178000	0.0719085
-26000	4178000	0.0662496
-24000	4178000	0.0731516
-22000	4178000	0.0916496
-20000	4178000	0.108525
-18000	4178000	0.115102
-16000	4178000	0.106298
-14000	4178000	0.0837297
-12000	4178000	0.0525392
-10000	4178000	0.0233763
-8000	4178000	0.00796808
-6000	4178000	-0.000884711
-4000	4178000	-0.00801992
-2000	4178000	-0.0137488
0	4178000	-0.0182354
2000	4178000	-0.0215707
-120000	4180000	-0.0529462
-118000	4180000	-0.0416369
-116000	4180000	-0.0293605
-114000	4180000	-0.0181897
-112000	4180000	-0.0105031
-110000	4180000	-0.00745899
-108000	4180000	-0.013132
-106000	4180000	-0.0188497
-104000	4180000	-0.0285945
-102000	4180000	-0.0437562
-100000	4180000	-0.057013
-98000	4180000	-0.0645559
-96000	4180000	-0.0648781
-94000	4180000	-0.0603632
-92000	4180000	-0.0551508
-90000	4180000	-0.0466671
-88000	4180000	-0.0264456
-86000	4180000	0.00455043
-84000	4180000	0.0266848
-82000	4180000	0.0545556
-80000	4180000	0.0892064
-78000	4180000	0.145973
-76000	4180000	0.209684
-74000	4180000	0.276238
-72000	4180000	0.322671
-70000	4180000	0.343201
-68000	4180000	0.378808
-66000	4180000	0.400056
-64000	4180000	0.403218
-62000	4180000	0.395313
-60000	4180000	0.372276
-58000	4180000	0.348985
-56000	4180000	0.305528
-54000	4180000	0.280365
-52000	4180000	0.252309
-50000	4180000	0.2339
-48000	4180000	0.21795
-46000	4180000	0.204684
-44000	4180000	0.195763
-42000	4180000	0.187041
-40000	4180000	0.165452
-38000	4180000	0.141693
-36000	4180000	0.126293
-34000	4180000	0.119113
-32000	4180000	0.112324
-30000	4180000	0.100536
-28000	4180000	0.0829409
-26000	4180000	0.0830319
-24000	4180000	0.105689
-22000	4180000	0.13841
-20000	4180000	0.16314
-18000	4180000	0.170474
-16000	4180000	0.155347
-14000	4180000	0.121961
-12000	4180000	0.0787461
-10000	4180000	0.0396888
-8000	4180000	0.0161549
-6000	4180000	0.00389105
-4000	4180000	-0.00364548
-2000	4180000	-0.00920727
0	4180000	-0.0136595
-122000	4182000	-0.0443422
-120000	4182000	-0.0321047
-118000	4182000	-0.0176724
-116000	4182000	-0.00261025
-114000	4182000	0.0101188
-112000	4182000	0.0194104
-110000	4182000	0.0270597
-108000	4182000	0.0241587
-106000	4182000	0.0223381
-104000	4182000	0.0162204
-102000	4182000	-0.000358568
-100000	4182000	-0.0146131
-98000	4182000	-0.0177711
-96000	4182000	-0.0138698
-94000	4182000	-0.00644991
-92000	4182000	0.000614591
-90000	4182000	0.0101086
-88000	4182000	0.0377336
-86000	4182000	0.0869172
-84000	4182000	0.112155
-82000	4182000	0.130338
-80000	4182000	0.178956
-78000	4182000	0.244438
-76000	4182000	0.323182
-74000	4182000	0.409132
-72000	4182000	0.463794
-70000	4182000	0.490015
-68000	4182000	0.518942
-66000	4182000	0.529947
-64000	4182000	0.5361
-62000	4182000	0.527413
-60000	4182000	0.495257
-58000	4182000	0.452894
-56000	4182000	0.411026
-54000	4182000	0.354481
-52000	4182000	0.306223
-50000	4182000	0.275948
-48000	4182000	0.246715
-46000	4182000	0.222249
-44000	4182000	0.207495
-42000	4182000	0.197298
-40000	4182000	0.176958
-38000	4182000	0.149999
-36000	4182000	0.13615
-34000	4182000	0.131559
-32000	4182000	0.128636
-30000	4182000	0.107561
-28000	4182000	0.0988825
-26000	4182000	0.110576
-24000	4182000	0.156642
-22000	4182000	0.20322
-20000	4182000	0.235062
-18000	4182000	0.238063
-16000	4182000	0.212802
-14000	4182000	0.165881
-12000	4182000	0.108164
-10000	4182000	0.0568511
-8000	4182000	0.026891
-6000	4182000	0.0118048
-4000	4182000	0.00340515
-2000	4182000	-0.00250861
-124000	4184000	-0.038337
-122000	4184000	-0.0275575
-120000	4184000	-0.0144532
-118000	4184000	0.00102114
-116000	4184000	0.0164364
-114000	4184000	0.0298353
-112000	4184000	0.0372452
-110000	4184000	0.0449452
-108000	4184000	0.049592
-106000	4184000	0.0543087
-104000	4184000	0.0573207
-102000	4184000	0.0398411
-100000	4184000	0.0285218
-98000	4184000	0.0281402
-96000	4184000	0.0348159
-94000	4184000	0.0426128
-92000	4184000	0.0506825
-90000	4184000	0.0567284
-88000	4184000	0.0835316
-86000	4184000	0.134333
-84000	4184000	0.178812
-82000	4184000	0.223988
-80000	4184000	0.291733
-78000	4184000	0.377097
-76000	4184000	0.475842
-74000	4184000	0.585796
-72000	4184000	0.675134
-70000	4184000	0.723568
-68000	4184000	0.775768
-66000	4184000	0.763986
-64000	4184000	0.759525
-62000	4184000	0.743732
-60000	4184000	0.684186
-58000	4184000	0.643713
-56000	4184000	0.556866
-54000	4184000	0.476391
-52000	4184000	0.393552
-50000	4184000	0.341643
-48000	4184000	0.292058
-46000	4184000	0.248618
-44000	4184000	0.225971
-42000	4184000	0.205856
-40000	4184000	0.190404
-38000	4184000	0.162751
-36000	4184000	0.144435
-34000	4184000	0.139588
-32000	4184000	0.127957
-30000	4184000	0.122104
-28000	4184000	0.139678
-26000	4184000	0.166528
-24000	4184000	0.2362
-22000	4184000	0.290965
-20000	4184000	0.318438
-18000	4184000	0.312542
-16000	4184000	0.274715
-14000	4184000	0.212408
-12000	4184000	0.137916
-10000	4184000	0.0716243
-8000	4184000	0.0387392
-6000	4184000	0.0231851
-4000	4184000	0.0142011
-2000	4184000	0.00738601
-124000	4186000	-0.024588
-122000	4186000	-0.0141292
-120000	4186000	-0.00154478
-118000	4186000	0.0126038
-116000	4186000	0.0260529
-114000	4186000	0.0371347
-112000	4186000	0.0448051
-110000	4186000	0.0542773
-108000	4186000	0.0621176
-106000	4186000	0.0676519
-104000	4186000	0.0711887
-102000	4186000	0.0664418
-100000	4186000	0.0599048
-98000	4186000	0.0617463
-96000	4186000	0.0715854
-94000	4186000	0.0726282
-92000	4186000	0.0738978
-90000	4186000	0.0909054
-88000	4186000	0.118896
-86000	4186000	0.183977
-84000	4186000	0.260006
-82000	4186000	0.33692
-80000	4186000	0.425947
-78000	4186000	0.55453
-76000	4186000	0.697358
-74000	4186000	0.85356
-72000	4186000	1.00539
-70000	4186000	1.11206
-68000	4186000	1.17211
-66000	4186000	1.15807
-64000	4186000	1.12334
-62000	4186000	1.07342
-60000	4186000	0.974407
-58000	4186000	0.858429
-56000	4186000	0.747084
-54000	4186000	0.630027
-52000	4186000	0.522326
-50000	4186000	0.437439
-48000	4186000	0.359961
-46000	4186000	0.291419
-44000	4186000	0.259228
-42000	4186000	0.235657
-40000	4186000	0.204963
-38000	4186000	0.170781
-36000	4186000	0.147206
-34000	4186000	0.136798
-32000	4186000	0.137784
-30000	4186000	0.159156
-28000	4186000	0.225537
-26000	4186000	0.298784
-24000	4186000	0.356462
-22000	4186000	0.392271
-20000	4186000	0.405179
-18000	4186000	0.389992
-16000	4186000	0.339794
-14000	4186000	0.263594
-12000	4186000	0.173955
-10000	4186000	0.0905914
-8000	4186000	0.0593507
-6000	4186000	0.0429409
-4000	4186000	0.0315031
-2000	4186000	0.0218838
0	4186000	0.0133177
-122000	4188000	-0.00334785
-120000	4188000	0.00814589
-118000	4188000	0.0205346
-116000	4188000	0.0326202
-114000	4188000	0.04345
-112000	4188000	0.0527934
-110000	4188000	0.0627199
-108000	4188000	0.0709811
-106000	4188000	0.0781606
-104000	4188000	0.0837777
-102000	4188000	0.085691
-100000	4188000	0.0785583
-98000	4188000	0.0821235
-96000	4188000	0.092035
-94000	4188000	0.0942703
-92000	4188000	0.0975322
-90000	4188000	0.11556
-88000	4188000	0.160347
-86000	4188000	0.26036
-84000	4188000	0.369222
-82000	4188000	0.471021
-80000	4188000	0.605422
-78000	4188000	0.793534
-76000	4188000	1.00563
-74000	4188000	1.21788
-72000	4188000	1.41372
-70000	4188000	1.55683
-68000	4188000	1.60826
-66000	4188000	1.58253
-64000	4188000	1.52479
-62000	4188000	1.44673
-60000	4188000	1.30272
-58000	4188000	1.1373
-56000	4188000	0.965396
-54000	4188000	0.807921
-52000	4188000	0.657642
-50000	4188000	0.543196
-48000	4188000	0.436927
-46000	4188000	0.347099
-44000	4188000	0.299726
-42000	4188000	0.272306
-40000	4188000	0.227152
-38000	4188000	0.187079
-36000	4188000	0.161132
-34000	4188000	0.153135
-32000	4188000	0.174022
-30000	4188000	0.22967
-28000	4188000	0.325248
-26000	4188000	0.432636
-24000	4188000	0.466062
-22000	4188000	0.477111
-20000	4188000	0.467337
-18000	4188000	0.458707
-16000	4188000	0.404025
-14000	4188000	0.323059
-12000	4188000	0.231978
-10000	4188000	0.151521
-8000	4188000	0.105314
-6000	4188000	0.076805
-4000	4188000	0.0568723
-2000	4188000	0.0410309
-122000	4190000	0.00483851
-120000	4190000	0.0150526
-118000	4190000	0.0260895
-116000	4190000	0.0370294
-114000	4190000	0.0470222
-112000	4190000	0.0570951
-110000	4190000	0.0671005
-108000	4190000	0.0762855
-106000	4190000	0.0842974
-104000	4190000	0.0899734
-102000	4190000	0.0927901
-100000	4190000	0.0922002
-98000	4190000	0.0955297
-96000	4190000	0.104906
-94000	4190000	0.110917
-92000	4190000	0.121053
-90000	4190000	0.155581
-88000	4190000	0.239161
-86000	4190000	0.366638
-84000	4190000	0.495118
-82000	4190000	0.629179
-80000	4190000	0.805676
-78000	4190000	1.05069
-76000	4190000	1.30909
-74000	4190000	1.56262
-72000	4190000	1.75806
-70000	4190000	1.88531
-68000	4190000	1.9311
-66000	4190000	1.89654
-64000	4190000	1.81016
-62000	4190000	1.70537
-60000	4190000	1.58625
-58000	4190000	1.40439
-56000	4190000	1.18692
-54000	4190000	0.984489
-52000	4190000	0.800369
-50000	4190000	0.641486
-48000	4190000	0.496671
-46000	4190000	0.403573
-44000	4190000	0.363773
-42000	4190000	0.324616
-40000	4190000	0.259695
-38000	4190000	0.211906
-36000	4190000	0.188296
-34000	4190000	0.197346
-32000	4190000	0.230035
-30000	4190000	0.306077
-28000	4190000	0.401147
-26000	4190000	0.489802
-24000	4190000	0.524135
-22000	4190000	0.517594
-20000	4190000	0.504756
-18000	4190000	0.494887
-16000	4190000	0.453307
-14000	4190000	0.378701
-12000	4190000	0.29242
-10000	4190000	0.215156
-8000	4190000	0.157924
-6000	4190000	0.116483
-4000	4190000	0.085771
-124000	4192000	0.00168961
-122000	4192000	0.00993668
-120000	4192000	0.0191919
-118000	4192000	0.0297928
-116000	4192000	0.0392743
-114000	4192000	0.0487523
-112000	4192000	0.0594262
-110000	4192000	0.0699681
-108000	4192000	0.0797424
-106000	4192000	0.0881953
-104000	4192000	0.0941373
-102000	4192000	0.0961754
-100000	4192000	0.0976199
-98000	4192000	0.0997256
-96000	4192000	0.114406
-94000	4192000	0.126934
-92000	4192000	0.145905
-90000	4192000	0.208069
-88000	4192000	0.319595
-86000	4192000	0.467102
-84000	4192000	0.610788
-82000	4192000	0.777059
-80000	4192000	0.99473
-78000	4192000	1.28055
-76000	4192000	1.5847
-74000	4192000	1.8318
-72000	4192000	2.02061
-70000	4192000	2.13353
-68000	4192000	2.17074
-66000	4192000	2.1471
-64000	4192000	2.03843
-62000	4192000	1.8894
-60000	4192000	1.7735
-58000	4192000	1.61272
-56000	4192000	1.38329
-54000	4192000	1.13957
-52000	4192000	0.929744
-50000	4192000	0.739558
-48000	4192000	0.560061
-46000	4192000	0.443555
-44000	4192000	0.383717
-42000	4192000	0.337943
-40000	4192000	0.280213
-38000	4192000	0.227345
-36000	4192000	0.213788
-34000	4192000	0.256639
-32000	4192000	0.357804
-30000	4192000	0.420734
-28000	4192000	0.49125
-26000	4192000	0.550358
-24000	4192000	0.574491
-22000	4192000	0.565374
-20000	4192000	0.550648
-18000	4192000	0.527188
-16000	4192000	0.49773
-14000	4192000	0.428252
-12000	4192000	0.348171
-10000	4192000	0.27232
-8000	4192000	0.206911
-6000	4192000	0.154054
-126000	4194000	-0.0012235
-124000	4194000	0.00516889
-122000	4194000	0.0123869
-120000	4194000	0.0214411
-118000	4194000	0.0308814
-116000	4194000	0.0398616
-114000	4194000	0.0487792
-112000	4194000	0.0607108
-110000	4194000	0.0712791
-108000	4194000	0.0802177
-106000	4194000	0.0892983
-104000	4194000	0.0957793
-102000	4194000	0.0963137
-100000	4194000	0.10013
-98000	4194000	0.104963
-96000	4194000	0.117888
-94000	4194000	0.136658
-92000	4194000	0.171651
-90000	4194000	0.248786
-88000	4194000	0.391933
-86000	4194000	0.572166
-84000	4194000	0.731022
-82000	4194000	0.925868
-80000	4194000	1.18003
-78000	4194000	1.46507
-76000	4194000	1.77772
-74000	4194000	2.02174
-72000	4194000	2.21721
-70000	4194000	2.33276
-68000	4194000	2.38312
-66000	4194000	2.34534
-64000	4194000	2.21272
-62000	4194000	2.03642
-60000	4194000	1.90766
-58000	4194000	1.7506
-56000	4194000	1.51638
-54000	4194000	1.24218
-52000	4194000	1.01251
-50000	4194000	0.808908
-48000	4194000	0.6175
-46000	4194000	0.485131
-44000	4194000	0.408942
-42000	4194000	0.354462
-40000	4194000	0.304711
-38000	4194000	0.248993
-36000	4194000	0.223941
-34000	4194000	0.279445
-32000	4194000	0.435432
-30000	4194000	0.527748
-28000	4194000	0.586978
-26000	4194000	0.621742
-24000	4194000	0.63204
-22000	4194000	0.62012
-20000	4194000	0.596043
-18000	4194000	0.565286
-16000	4194000	0.535814
-14000	4194000	0.473533
-12000	4194000	0.399906
-10000	4194000	0.322308
-8000	4194000	0.247448
-6000	4194000	0.184307
-148000	4196000	-0.0187235
-126000	4196000	0.00100226
-124000	4196000	0.00627097
-122000	4196000	0.0125851
-120000	4196000	0.0203711
-118000	4196000	0.0282087
-116000	4196000	0.0363693
-114000	4196000	0.0451403
-112000	4196000	0.0591567
-110000	4196000	0.0676446
-108000	4196000	0.0743551
-106000	4196000	0.0843879
-104000	4196000	0.0894788
-102000	4196000	0.0931721
-100000	4196000	0.0961509
-98000	4196000	0.103666
-96000	4196000	0.12043
-94000	4196000	0.151326
-92000	4196000	0.200564
-90000	4196000	0.289886
-88000	4196000	0.456192
-86000	4196000	0.671476
-84000	4196000	0.827514
-82000	4196000	1.02383
-80000	4196000	1.28983
-78000	4196000	1.60853
-76000	4196000	1.91652
-74000	4196000	2.15293
-72000	4196000	2.33624
-70000	4196000	2.47086
-68000	4196000	2.53466
-66000	4196000	2.4907
-64000	4196000	2.31696
-62000	4196000	2.15406
-60000	4196000	2.03194
-58000	4196000	1.84881
-56000	4196000	1.60142
-54000	4196000	1.32683
-52000	4196000	1.07026
-50000	4196000	0.863206
-48000	4196000	0.666493
-46000	4196000	0.534434
-44000	4196000	0.44862
-42000	4196000	0.38746
-40000	4196000	0.340583
-38000	4196000	0.290395
-36000	4196000	0.269986
-34000	4196000	0.321596
-32000	4196000	0.487864
-30000	4196000	0.614507
-28000	4196000	0.666966
-26000	4196000	0.687039
-24000	4196000	0.687268
-22000	4196000	0.669987
-20000	4196000	0.640504
-18000	4196000	0.609101
-16000	4196000	0.584568
-14000	4196000	0.51991
-12000	4196000	0.448453
-10000	4196000	0.363225
-8000	4196000	0.272586
-6000	4196000	0.199566
-4000	4196000	0.141449
-150000	4198000	-0.0116995
-148000	4198000	-0.0122495
-146000	4198000	-0.0125651
-134000	4198000	-0.00742762
-126000	4198000	0.0012908
-124000	4198000	0.00524619
-122000	4198000	0.0102254
-120000	4198000	0.0160985
-118000	4198000	0.0221689
-116000	4198000	0.0291334
-114000	4198000	0.0393941
-112000	4198000	0.051208
-110000	4198000	0.058395
-108000	4198000	0.062666
-106000	4198000	0.0772566
-104000	4198000	0.0829605
-102000	4198000	0.0872251
-100000	4198000	0.091195
-98000	4198000	0.101107
-96000	4198000	0.121771
-94000	4198000	0.15728
-92000	4198000	0.223876
-90000	4198000	0.314904
-88000	4198000	0.482679
-86000	4198000	0.703488
-84000	4198000	0.886907
-82000	4198000	1.08334
-80000	4198000	1.35
-78000	4198000	1.67397
-76000	4198000	1.97712
-74000	4198000	2.20952
-72000	4198000	2.38336
-70000	4198000	2.52444
-68000	4198000	2.58105
-66000	4198000	2.53937
-64000	4198000	2.3734
-62000	4198000	2.21348
-60000	4198000	2.09689
-58000	4198000	1.91338
-56000	4198000	1.65796
-54000	4198000	1.37693
-52000	4198000	1.10023
-50000	4198000	0.905191
-48000	4198000	0.732173
-46000	4198000	0.599776
-44000	4198000	0.512712
-42000	4198000	0.443782
-40000	4198000	0.392375
-38000	4198000	0.34628
-36000	4198000	0.329504
-34000	4198000	0.382821
-32000	4198000	0.543802
-30000	4198000	0.674242
-28000	4198000	0.723856
-26000	4198000	0.740858
-24000	4198000	0.740461
-22000	4198000	0.718637
-20000	4198000	0.685481
-18000	4198000	0.659932
-16000	4198000	0.625376
-14000	4198000	0.558502
-12000	4198000	0.489453
-10000	4198000	0.378887
-8000	4198000	0.272109
-6000	4198000	0.193297
-4000	4198000	0.132415
-2000	4198000	0.0844029
-152000	4200000	-0.00560522
-150000	4200000	-0.00604064
-148000	4200000	-0.00617865
-146000	4200000	-0.00628688
-144000	4200000	-0.00627642
-136000	4200000	-0.00434579
-134000	4200000	-0.0039438
-132000	4200000	-0.00348473
-124000	4200000	0.00270779
-122000	4200000	0.0061018
-120000	4200000	0.0102987
-118000	4200000	0.0152154
-116000	4200000	0.0218554
-114000	4200000	0.031336
-112000	4200000	0.0417808
-110000	4200000	0.0498612
-108000	4200000	0.0535492
-106000	4200000	0.0647619
-104000	4200000	0.0728621
-102000	4200000	0.0796761
-100000	4200000	0.0851001
-98000	4200000	0.0985442
-96000	4200000	0.12565
-94000	4200000	0.168954
-92000	4200000	0.226659
-90000	4200000	0.315557
-88000	4200000	0.494193
-86000	4200000	0.72719
-84000	4200000	0.91488
-82000	4200000	1.10783
-80000	4200000	1.37347
-78000	4200000	1.68927
-76000	4200000	1.97751
-74000	4200000	2.19556
-72000	4200000	2.36389
-70000	4200000	2.50258
-68000	4200000	2.5458
-66000	4200000	2.52741
-64000	4200000	2.3728
-62000	4200000	2.21623
-60000	4200000	2.08473
-58000	4200000	1.90658
-56000	4200000	1.66458
-54000	4200000	1.38282
-52000	4200000	1.12112
-50000	4200000	0.943014
-48000	4200000	0.778858
-46000	4200000	0.652147
-44000	4200000	0.563409
-42000	4200000	0.498214
-40000	4200000	0.455665
-38000	4200000	0.435166
-36000	4200000	0.423447
-34000	4200000	0.464121
-32000	4200000	0.604932
-30000	4200000	0.740464
-28000	4200000	0.789133
-26000	4200000	0.784673
-24000	4200000	0.779028
-22000	4200000	0.760521
-20000	4200000	0.725597
-18000	4200000	0.699294
-16000	4200000	0.667759
-14000	4200000	0.600284
-12000	4200000	0.516563
-10000	4200000	0.368965
-8000	4200000	0.24464
-6000	4200000	0.164735
-4000	4200000	0.107252
-2000	4200000	0.0627665
0	4200000	0.0289438
-154000	4202000	-0.000568662
-152000	4202000	-0.000866294
-150000	4202000	-0.000646878
-148000	4202000	-0.000401315
-146000	4202000	-0.000341288
-144000	4202000	-0.000340378
-142000	4202000	-0.000306954
-138000	4202000	-0.00037403
-136000	4202000	-0.000821956
-134000	4202000	-0.00137925
-132000	4202000	-0.00203841
-130000	4202000	-0.00253362
-122000	4202000	0.0009411
-120000	4202000	0.00358204
-118000	4202000	0.00740147
-116000	4202000	0.0130713
-114000	4202000	0.021118
-112000	4202000	0.0299044
-110000	4202000	0.0376792
-108000	4202000	0.0435693
-106000	4202000	0.0519199
-104000	4202000	0.0593682
-102000	4202000	0.0663415
-100000	4202000	0.0745542
-98000	4202000	0.0902207
-96000	4202000	0.122537
-94000	4202000	0.173827
-92000	4202000	0.224924
-90000	4202000	0.31177
-88000	4202000	0.482784
-86000	4202000	0.700066
-84000	4202000	0.901302
-82000	4202000	1.0929
-80000	4202000	1.33675
-78000	4202000	1.64677
-76000	4202000	1.93814
-74000	4202000	2.13736
-72000	4202000	2.31398
-70000	4202000	2.43493
-68000	4202000	2.49684
-66000	4202000	2.47447
-64000	4202000	2.34048
-62000	4202000	2.17504
-60000	4202000	2.05143
-58000	4202000	1.88126
-56000	4202000	1.63493
-54000	4202000	1.35228
-52000	4202000	1.11874
-50000	4202000	0.960142
-48000	4202000	0.810091
-46000	4202000	0.691161
-44000	4202000	0.614192
-42000	4202000	0.577969
-40000	4202000	0.531966
-38000	4202000	0.519291
-36000	4202000	0.522091
-34000	4202000	0.544615
-32000	4202000	0.658003
-30000	4202000	0.789126
-28000	4202000	0.834099
-26000	4202000	0.836675
-24000	4202000	0.819823
-22000	4202000	0.792043
-20000	4202000	0.75866
-18000	4202000	0.72762
-16000	4202000	0.688957
-14000	4202000	0.609583
-12000	4202000	0.485174
-10000	4202000	0.328656
-8000	4202000	0.196212
-6000	4202000	0.125415
-4000	4202000	0.075117
-2000	4202000	0.0380778
0	4202000	0.00912951
2000	4202000	-0.0141952
-156000	4204000	0.00324849
-154000	4204000	0.00325531
-152000	4204000	0.00351065
-150000	4204000	0.00407522
-148000	4204000	0.00453565
-146000	4204000	0.00505565
-144000	4204000	0.00511204
-142000	4204000	0.0048517
-140000	4204000	0.00435898
-138000	4204000	0.00350542
-136000	4204000	0.0023897
-134000	4204000	0.000821046
-132000	4204000	-0.000954515
-130000	4204000	-0.0026223
-128000	4204000	-0.00386922
-120000	4204000	-0.00373461
-118000	4204000	-0.00133377
-116000	4204000	0.0029861
-114000	4204000	0.00927594
-112000	4204000	0.0165448
-110000	4204000	0.023696
-108000	4204000	0.0303194
-106000	4204000	0.0373275
-104000	4204000	0.0441269
-102000	4204000	0.0515345
-100000	4204000	0.0614621
-98000	4204000	0.0789289
-96000	4204000	0.113665
-94000	4204000	0.16647
-92000	4204000	0.22189
-90000	4204000	0.305716
-88000	4204000	0.466582
-86000	4204000	0.66137
-84000	4204000	0.86023
-82000	4204000	1.04217
-80000	4204000	1.26954
-78000	4204000	1.56714
-76000	4204000	1.84746
-74000	4204000	2.04772
-72000	4204000	2.22052
-70000	4204000	2.35652
-68000	4204000	2.39768
-66000	4204000	2.35689
-64000	4204000	2.23777
-62000	4204000	2.11628
-60000	4204000	1.9969
-58000	4204000	1.82693
-56000	4204000	1.59674
-54000	4204000	1.31852
-52000	4204000	1.09854
-50000	4204000	0.963644
-48000	4204000	0.843422
-46000	4204000	0.744511
-44000	4204000	0.685297
-42000	4204000	0.661493
-40000	4204000	0.645311
-38000	4204000	0.635945
-36000	4204000	0.640007
-34000	4204000	0.644981
-32000	4204000	0.707932
-30000	4204000	0.802667
-28000	4204000	0.862785
-26000	4204000	0.882508
-24000	4204000	0.870053
-22000	4204000	0.835577
-20000	4204000	0.805227
-18000	4204000	0.778715
-16000	4204000	0.727642
-14000	4204000	0.627798
-12000	4204000	0.465924
-10000	4204000	0.298535
-8000	4204000	0.17604
-6000	4204000	0.100636
-4000	4204000	0.0528235
-2000	4204000	0.022312
0	4204000	-0.00326622
2000	4204000	-0.0257032
4000	4204000	-0.0450027
-158000	4206000	0.00563773
-156000	4206000	0.00613227
-154000	4206000	0.00649243
-152000	4206000	0.00697082
-150000	4206000	0.00779232
-148000	4206000	0.00863611
-146000	4206000	0.010069
-144000	4206000	0.010187
-142000	4206000	0.00961677
-140000	4206000	0.00867817
-138000	4206000	0.00740943
-136000	4206000	0.0055129
-134000	4206000	0.00287491
-132000	4206000	3.68345e-05
-130000	4206000	-0.00264254
-128000	4206000	-0.00496789
-126000	4206000	-0.00704358
-118000	4206000	-0.0103441
-116000	4206000	-0.00770137
-114000	4206000	-0.00314503
-112000	4206000	0.00262116
-110000	4206000	0.00901809
-108000	4206000	0.0155408
-106000	4206000	0.0221901
-104000	4206000	0.029122
-102000	4206000	0.0377695
-100000	4206000	0.049984
-98000	4206000	0.0691075
-96000	4206000	0.106144
-94000	4206000	0.158049
-92000	4206000	0.216277
-90000	4206000	0.292211
-88000	4206000	0.423394
-86000	4206000	0.597901
-84000	4206000	0.795662
-82000	4206000	0.972205
-80000	4206000	1.16952
-78000	4206000	1.43633
-76000	4206000	1.69105
-74000	4206000	1.91194
-72000	4206000	2.09661
-70000	4206000	2.20327
-68000	4206000	2.23345
-66000	4206000	2.19878
-64000	4206000	2.11188
-62000	4206000	1.9998
-60000	4206000	1.86465
-58000	4206000	1.69269
-56000	4206000	1.47779
-54000	4206000	1.25403
-52000	4206000	1.10519
-50000	4206000	0.990945
-48000	4206000	0.896475
-46000	4206000	0.813899
-44000	4206000	0.791403
-42000	4206000	0.804551
-40000	4206000	0.807659
-38000	4206000	0.812991
-36000	4206000	0.812352
-34000	4206000	0.786282
-32000	4206000	0.791922
-30000	4206000	0.822833
-28000	4206000	0.929764
-26000	4206000	0.971752
-24000	4206000	0.956963
-22000	4206000	0.918181
-20000	4206000	0.872175
-18000	4206000	0.826865
-16000	4206000	0.732843
-14000	4206000	0.571608
-12000	4206000	0.39919
-10000	4206000	0.253694
-8000	4206000	0.155472
-6000	4206000	0.086852
-4000	4206000	0.0442885
-2000	4206000	0.0224238
0	4206000	-0.00357295
2000	4206000	-0.0287066
4000	4206000	-0.0506227
6000	4206000	-0.0688963
-158000	4208000	0.0074358
-156000	4208000	0.00825548
-154000	4208000	0.00891441
-152000	4208000	0.0097873
-150000	4208000	0.0112548
-148000	4208000	0.0132618
-146000	4208000	0.0152531
-144000	4208000	0.0149109
-142000	4208000	0.014008
-140000	4208000	0.0127729
-138000	4208000	0.0110217
-136000	4208000	0.00825798
-134000	4208000	0.00466798
-132000	4208000	0.00106184
-130000	4208000	-0.00233672
-128000	4208000	-0.00549539
-126000	4208000	-0.00871455
-124000	4208000	-0.0121554
-116000	4208000	-0.0179371
-112000	4208000	-0.0104772
-110000	4208000	-0.00482032
-108000	4208000	0.00157161
-106000	4208000	0.00837986
-104000	4208000	0.0161554
-102000	4208000	0.0267748
-100000	4208000	0.0415628
-98000	4208000	0.0637067
-96000	4208000	0.10177
-94000	4208000	0.152231
-92000	4208000	0.205345
-90000	4208000	0.278878
-88000	4208000	0.387652
-86000	4208000	0.530524
-84000	4208000	0.695727
-82000	4208000	0.846747
-80000	4208000	1.02481
-78000	4208000	1.25431
-76000	4208000	1.48263
-74000	4208000	1.67465
-72000	4208000	1.83577
-70000	4208000	1.95169
-68000	4208000	1.99602
-66000	4208000	1.98666
-64000	4208000	1.87437
-62000	4208000	1.77018
-60000	4208000	1.63654
-58000	4208000	1.4803
-56000	4208000	1.33831
-54000	4208000	1.19428
-52000	4208000	1.07722
-50000	4208000	1.01302
-48000	4208000	0.954224
-46000	4208000	0.926738
-44000	4208000	0.971867
-42000	4208000	1.00649
-40000	4208000	1.03029
-38000	4208000	1.04136
-36000	4208000	1.07209
-34000	4208000	1.05302
-32000	4208000	1.01745
-30000	4208000	0.989118
-28000	4208000	1.01062
-26000	4208000	1.062
-24000	4208000	1.07998
-22000	4208000	1.02846
-20000	4208000	0.949829
-18000	4208000	0.846664
-16000	4208000	0.723411
-14000	4208000	0.519222
-12000	4208000	0.345165
-10000	4208000	0.236775
-8000	4208000	0.152077
-6000	4208000	0.0868938
-4000	4208000	0.046532
-2000	4208000	0.0350519
0	4208000	0.00384102
2000	4208000	-0.0261364
4000	4208000	-0.0513592
6000	4208000	-0.0720793
8000	4208000	-0.0888301
-160000	4210000	0.00726322
-158000	4210000	0.008396
-156000	4210000	0.00957493
-154000	4210000	0.0106252
-152000	4210000	0.012001
-150000	4210000	0.0140867
-148000	4210000	0.0175328
-146000	4210000	0.0185717
-144000	4210000	0.0183597
-142000	4210000	0.0175839
-140000	4210000	0.0163081
-138000	4210000	0.0142286
-136000	4210000	0.0107634
-134000	4210000	0.00650334
-132000	4210000	0.00233513
-130000	4210000	-0.00157138
-128000	4210000	-0.00532464
-126000	4210000	-0.00953491
-110000	4210000	-0.0166899
-108000	4210000	-0.0103198
-102000	4210000	0.0188927
-100000	4210000	0.0362427
-98000	4210000	0.0600442
-96000	4210000	0.0949733
-94000	4210000	0.138105
-92000	4210000	0.189728
-90000	4210000	0.261027
-88000	4210000	0.362219
-86000	4210000	0.476691
-84000	4210000	0.608281
-82000	4210000	0.740405
-80000	4210000	0.889343
-78000	4210000	1.08517
-76000	4210000	1.28614
-74000	4210000	1.40366
-72000	4210000	1.50076
-70000	4210000	1.59767
-68000	4210000	1.64109
-66000	4210000	1.64775
-64000	4210000	1.57465
-62000	4210000	1.49171
-60000	4210000	1.39783
-58000	4210000	1.31448
-56000	4210000	1.21899
-54000	4210000	1.16249
-52000	4210000	1.11186
-50000	4210000	1.08064
-48000	4210000	1.07782
-46000	4210000	1.12439
-44000	4210000	1.2177
-42000	4210000	1.2898
-40000	4210000	1.32014
-38000	4210000	1.34959
-36000	4210000	1.38252
-34000	4210000	1.39496
-32000	4210000	1.35214
-30000	4210000	1.30758
-28000	4210000	1.26884
-26000	4210000	1.21492
-24000	4210000	1.15129
-22000	4210000	1.09353
-20000	4210000	0.963806
-18000	4210000	0.81232
-16000	4210000	0.667226
-14000	4210000	0.491868
-12000	4210000	0.344341
-10000	4210000	0.250991
-8000	4210000	0.164167
-6000	4210000	0.0984874
-4000	4210000	0.0565497
-2000	4210000	0.0332584
0	4210000	0.00456794
2000	4210000	-0.0240504
4000	4210000	-0.0495038
6000	4210000	-0.0713326
-158000	4212000	0.00850582
-156000	4212000	0.0100351
-154000	4212000	0.0115599
-152000	4212000	0.0134019
-150000	4212000	0.0157797
-148000	4212000	0.0185717
-146000	4212000	0.020078
-144000	4212000	0.0205184
-142000	4212000	0.0201749
-140000	4212000	0.0191822
-138000	4212000	0.0170573
-136000	4212000	0.0128966
-134000	4212000	0.00798127
-132000	4212000	0.00340424
-130000	4212000	-0.000830141
-128000	4212000	-0.00493742
-126000	4212000	-0.0102914
-104000	4212000	-0.000884938
-102000	4212000	0.0136949
-100000	4212000	0.0324155
-98000	4212000	0.056438
-96000	4212000	0.0879975
-94000	4212000	0.126574
-92000	4212000	0.176256
-90000	4212000	0.245444
-88000	4212000	0.331361
-86000	4212000	0.429384
-84000	4212000	0.542353
-82000	4212000	0.663567
-80000	4212000	0.778307
-78000	4212000	0.917614
-76000	4212000	1.06065
-74000	4212000	1.1593
-72000	4212000	1.22407
-70000	4212000	1.24919
-68000	4212000	1.29059
-66000	4212000	1.30843
-64000	4212000	1.26491
-62000	4212000	1.25828
-60000	4212000	1.2594
-58000	4212000	1.24163
-56000	4212000	1.19312
-54000	4212000	1.17359
-52000	4212000	1.18556
-50000	4212000	1.2105
-48000	4212000	1.26394
-46000	4212000	1.3445
-44000	4212000	1.48684
-42000	4212000	1.57402
-40000	4212000	1.65171
-38000	4212000	1.7077
-36000	4212000	1.72809
-34000	4212000	1.7413
-32000	4212000	1.71014
-30000	4212000	1.64058
-28000	4212000	1.60198
-26000	4212000	1.48895
-24000	4212000	1.34424
-22000	4212000	1.19527
-20000	4212000	1.01714
-18000	4212000	0.844204
-16000	4212000	0.6805
-14000	4212000	0.502815
-12000	4212000	0.361923
-10000	4212000	0.262009
-8000	4212000	0.178443
-6000	4212000	0.113772
-4000	4212000	0.0673649
-2000	4212000	0.0346083
0	4212000	0.00577052
2000	4212000	-0.0202701
4000	4212000	-0.0430791
6000	4212000	-0.0652608
8000	4212000	-0.0857817
68000	4212000	0.0891773
-156000	4214000	0.00964792
-154000	4214000	0.0115681
-152000	4214000	0.0137074
-150000	4214000	0.0161363
-148000	4214000	0.0187624
-146000	4214000	0.0205921
-144000	4214000	0.021432
-142000	4214000	0.0214216
-140000	4214000	0.0207347
-138000	4214000	0.0187126
-136000	4214000	0.0134755
-134000	4214000	0.00788168
-132000	4214000	0.00292289
-130000	4214000	-0.000914724
-128000	4214000	-0.00532577
-126000	4214000	-0.0117691
-124000	4214000	-0.0191535
-106000	4214000	-0.0174609
-104000	4214000	-0.0051034
-102000	4214000	0.010449
-100000	4214000	0.0298503
-98000	4214000	0.0540474
-96000	4214000	0.0835764
-94000	4214000	0.119079
-92000	4214000	0.163751
-90000	4214000	0.220518
-88000	4214000	0.295347
-86000	4214000	0.383697
-84000	4214000	0.480105
-82000	4214000	0.588506
-80000	4214000	0.684779
-78000	4214000	0.800492
-76000	4214000	0.917954
-74000	4214000	0.986073
-72000	4214000	1.04219
-70000	4214000	1.09476
-68000	4214000	1.11718
-66000	4214000	1.12455
-64000	4214000	1.14114
-62000	4214000	1.14939
-60000	4214000	1.18335
-58000	4214000	1.20488
-56000	4214000	1.20593
-54000	4214000	1.24776
-52000	4214000	1.30922
-50000	4214000	1.36489
-48000	4214000	1.4643
-46000	4214000	1.58603
-44000	4214000	1.74042
-42000	4214000	1.86414
-40000	4214000	1.97945
-38000	4214000	2.03616
-36000	4214000	2.09634
-34000	4214000	2.11747
-32000	4214000	2.06605
-30000	4214000	1.98619
-28000	4214000	1.89458
-26000	4214000	1.79633
-24000	4214000	1.60349
-22000	4214000	1.37123
-20000	4214000	1.12966
-18000	4214000	0.944388
-16000	4214000	0.7465
-14000	4214000	0.552709
-12000	4214000	0.401456
-10000	4214000	0.288676
-8000	4214000	0.205554
-6000	4214000	0.137095
-4000	4214000	0.0825969
-2000	4214000	0.0403563
0	4214000	0.0104549
2000	4214000	-0.00964951
4000	4214000	-0.0282901
6000	4214000	-0.0513894
8000	4214000	-0.0752825
10000	4214000	-0.0955663
66000	4214000	0.0788241
68000	4214000	0.0903194
70000	4214000	0.102189
-154000	4216000	0.0106459
-152000	4216000	0.0130074
-150000	4216000	0.0155769
-148000	4216000	0.018073
-146000	4216000	0.0199082
-144000	4216000	0.020694
-142000	4216000	0.0208347
-140000	4216000	0.0196108
-138000	4216000	0.0162597
-136000	4216000	0.0106911
-134000	4216000	0.00495834
-132000	4216000	0.000963837
-130000	4216000	-0.00113505
-128000	4216000	-0.00451018
-126000	4216000	-0.012913
-124000	4216000	-0.0223788
-122000	4216000	-0.031504
-108000	4216000	-0.0317093
-106000	4216000	-0.0200985
-104000	4216000	-0.0062787
-102000	4216000	0.0094783
-100000	4216000	0.0290563
-98000	4216000	0.0532677
-96000	4216000	0.0821597
-94000	4216000	0.117299
-92000	4216000	0.151288
-90000	4216000	0.196784
[truncated: 40,462 more rows]
